# Supplementary material for: Effect of extreme temperature changes on phenolic, flavonoid contents and antioxidant activity of tomato seedlings (Solanum lycopersicum L.)
Source: PeerJ. 2021 May 12;9:e11193. doi: 10.7717/peerj.11193 (PMC8123231; doi:10.7717/peerj.11193)
Supplement: Supplemental Information 5 [file peerj-09-11193-s005.xlsx]

## Sheet: ورقة1
Temperature	Pyrogallol	Quinol	GallicAcid	Catechol	pHydroxyBenzoicAcid	Catechin	ChlorogenicAcid	VanillicAcid	CaffeicAcid	SyringicAcid	pCoumaricAcid	BenzoicAcid	FerulicAcid	Rutin	EllagicAcid	oCoumaricAcid	Resvertol	Quercetin	RosemarinicAcid	Neringein	Myricetin	Kampherol	CinnamicAcid
25	11.9876	0	0	0	260.912	21.876	3688.88	80.0207	30.2057	40.3322	5.82279	25.5649	44.3056	0	0	25.0597	8356.34	17.014	120.592	55.7714	0	122.293	0
25	12.1858	0	0	0	263.645	22.8828	3678.88	85.0207	33.2058	45.3322	6.82279	22.5649	46.3056	0	0	26.0597	8336.34	18.014	123.592	56.7714	0	126.293	0
25	13.0324	0	0	0	267.012	23.8976	3658.88	90.0207	36.2058	50.3322	7.82279	19.5649	48.3056	0	0	27.0597	8316.34	19.014	126.592	57.7714	0	130.293	0
4	0	987.786	49.8976	320.012	500.988	5.9012	123.012	1842.29	70.3265	20.2785	48.0388	8020.37	35.4961	650.833	0	125.454	155.266	0	2329.47	159.262	0	92.7028	92.9385
4	0	992.032	53.982	314.878	509.701	4.54015	118.47	1824.29	76.3265	26.2785	43.0388	8010.37	38.4961	658.833	0	126.454	158.266	0	2319.47	153.262	0	91.7028	91.9385
4	0	999.012	57.6543	308.912	515.001	3.9123	115.988	1804.29	82.3265	32.2785	38.0388	8000.37	41.4961	666.833	0	127.454	161.266	0	2309.47	147.262	0	90.7028	90.9385
50	0	145.898	110.988	0	0	14.9876	282.971	2440.43	10.6381	60.3689	50.7749	3985.99	55.5616	47.8084	13.3946	102.859	0	340.437	348.381	34.1487	0	55.3771	27.088
50	0	138.737	111.926	0	0	15.2773	292.971	2420.43	9.63807	62.3689	52.7749	3995.99	56.5616	52.8084	14.3946	100.859	0	344.437	344.381	35.1487	0	58.3771	25.088
50	0	135.654	112.012	0	0	16.3214	299.971	2460.43	8.63807	64.3689	54.7749	4005.99	57.5616	57.8084	15.3946	101.859	0	348.437	340.381	36.1487	0	61.3771	23.088
45	0	135.789	84.3324	0	0	45.8765	240.249	2900.31	9.63659	69.5721	70.4524	3937.87	50.4399	118.004	0	170.02	0	520.523	35.8248	20.7707	0	0	0
45	0	129.861	79.6284	0	0	49.8957	243.249	2936.31	11.6366	74.5721	69.4524	3927.87	56.4399	108.004	0	171.02	0	516.523	38.8248	26.7707	0	0	0
45	0	127.987	75.7895	0	0	55.0123	249.249	2972.31	10.6366	79.5721	68.4524	3917.87	62.4399	100.004	0	173.02	0	512.523	41.8248	32.7707	0	0	0
