# Supplementary material for: Effect of extreme temperature changes on phenolic, flavonoid contents and antioxidant activity of tomato seedlings (Solanum lycopersicum L.)
Source: PeerJ. 2021 May 12;9:e11193. doi: 10.7717/peerj.11193 (PMC8123231; doi:10.7717/peerj.11193)
Supplement: Supplemental Information 6 [file peerj-09-11193-s006.xlsx]

## Sheet: DPPH
								µM Trolox	% Inhibition	25 ̊C	4 ̊C	45 ̊C	50 ̊C
								250	25	26	31.46	17	16.38		IC50- 25	626.995
									26						R^2	0.9792
									27
								500	45	45.3333	54.81	29.63	28.54		IC50- 4	467.729
									44						R^2	0.9796
									47
								750	56	55.6667	68.12	36.82	35.47		IC50- 45	1108.63
									54						R^2	0.979
									57
								1000	77	77	93.17	50.36	48.51		IC50- 50	1161.33
									78						R^2	0.979
									76
								1250	83	81.6667	98.49	53.24	51.28		IC50- 25	626.995
									82
									80
								1500	96	96	116.7	62.78	60.48		4 ̊C	467.729	54.9
									97						25 ̊C	626.995	66.5
									95						45 ̊C	1108.63	35.8
															50 ̊C	1161.33	34.5
							DPPH

## Sheet: ABST
								µM Trolox	% Inhibition	25 ̊C	4 ̊C	45 ̊C	50 ̊C
								2.5	6	6	7.26	3.93	3.78
									5
									7						IC50- 25	11.0256
								5	22.5	22	26.38	14.26	13.73		R^2	0.9885
									23
									20.5						IC50- 4	8.97193
								7.5	33	34	41.14	22.24	21.42		R^2	0.9959
									34
									35						IC50- 45	16.9848
								10	41	42.6667	51.43	27.8	26.78		R^2	0.987
									44
									43						IC50- 50	17.6127
								12.5	60.6	60.1667	71.39	38.59	37.17		R^2	0.9871
									61
									58.9						4 ̊C	8.97193	0.47
								15	70	71.1667	85.91	46.43	44.73		25 ̊C	11.0256	0.524
									71.5						45 ̊C	16.9848	0.73
									72						50 ̊C	17.6127	0.82
								20	88.9	87.6833	104.2	56.24	54.18
									86.5
									87.65
				ABST
