# Supplementary material for: Effect of extreme temperature changes on phenolic, flavonoid contents and antioxidant activity of tomato seedlings (Solanum lycopersicum L.)
Source: PeerJ. 2021 May 12;9:e11193. doi: 10.7717/peerj.11193 (PMC8123231; doi:10.7717/peerj.11193)
Supplement: Supplemental Information 7 [file peerj-09-11193-s007.xlsx]

## Sheet: Sheet1
no. of signals
	4 °C	25 °C	45 °C	50 °C
Phe	16	14	13	14
	1.32	0.91	0.82	0.87
Flav	5	3	3	5
	0.51	0.32	0.09	0.46
Phe + Flav	21	17	16	19
	1.83	1.23	1.01	1.33

## Sheet: Sheet3
	4 °C	25 °C	45 °C	50 °C
Total Phenols	12445.9	12631.1	8243.34	7637.24
	1100	1211	812	369
Total Flavnoids	3166.49	272.768	196.724	495.932
	231	87	43	88
Total Phe+ Flav	15612.4	12903.9	8440.06	8133.17
	1321	1300	865	457

## Sheet: ورقة2
	4 °C	25 °C	45 °C	50 °C		4 °C	25 °C	45 °C	50 °C
Precentage amount of Benzoic acid	64.3616	1.17865	47.649	52.3225		8010.37	22.5649	3927.87	3995.99
	2.34	0.056	1.21	1.11		79.34	0.56	58.21	41.11
	4 °C	25 °C	45 °C	50 °C		4 °C	25 °C	45 °C	50 °C
Precentage amount of Quercetin	73.2507	45.3103	19.7356	69.4412		2319.47	123.592	38.8248	344.381
	3.34	1.56	3.11	2.21		34.35	12.5	8.11	23.21

## Sheet: ورقة3
		4 °C	25 °C	45 °C	50 °C
	Total Phenolics	130.85	100.17	66.86	68.14
		16.07	13.09	8.99	8.36
		4 °C	25 °C	45 °C	50 °C
	Total Flavonoids	60.65	45.34	31.19	31.58
		10.87	8.29	5.19	5.22
